# Supplementary material for: New Insights into the Metabolism of Methyltestosterone and Metandienone: Detection of Novel A-Ring Reduced Metabolites
Source: MDPI journal article supplement (doi:10.3390/molecules26051354), 2021-03-03
Supplement: s1 [file s1]

## Supplement S3: Chromatograms of urine samples

### Post administration urine of metandienone, collected 48 h after ingestion

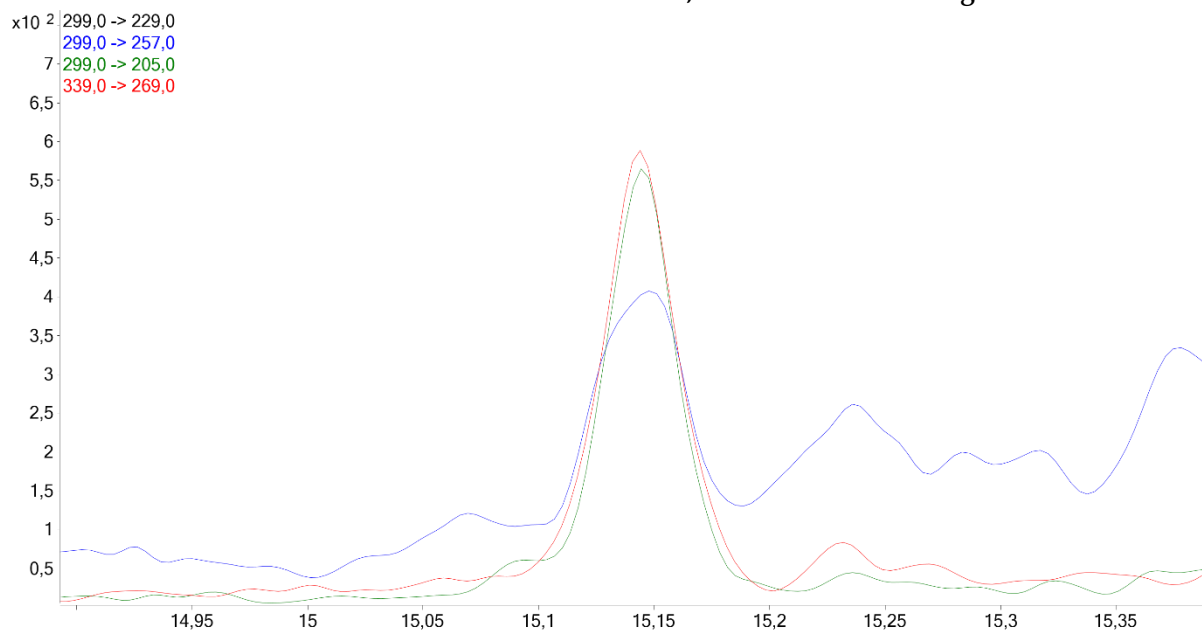

Figure S3-1: GC-MS chromatogram of metandienone (12)

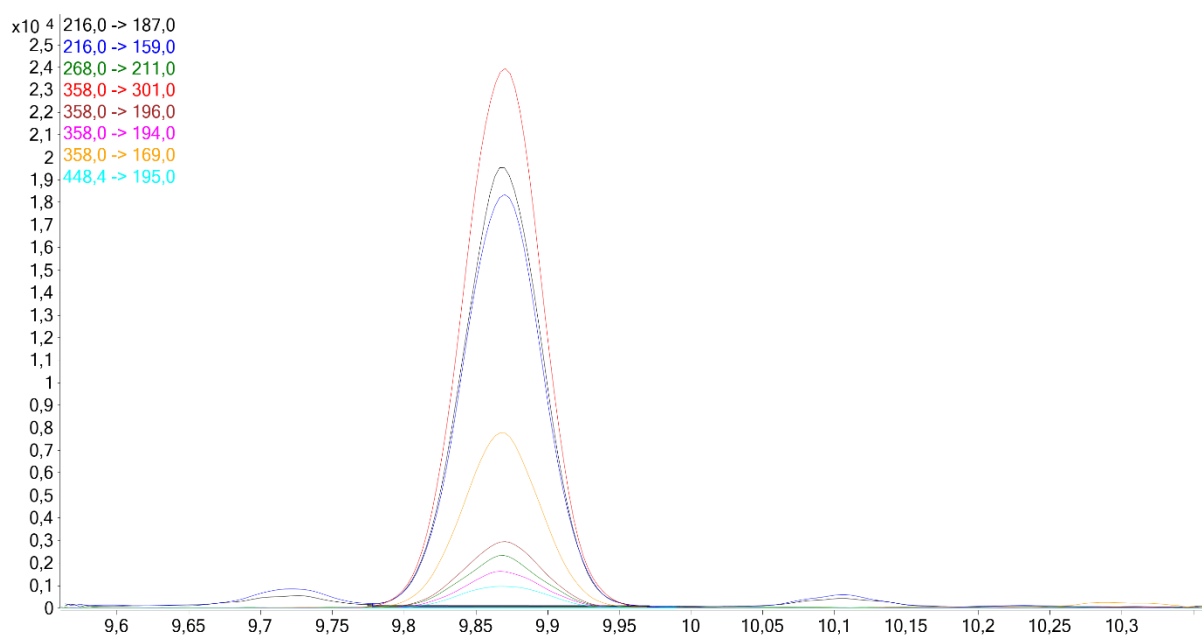

Figure S3-2: GC-MS chromatogram of epimetendiol (M1, 15)

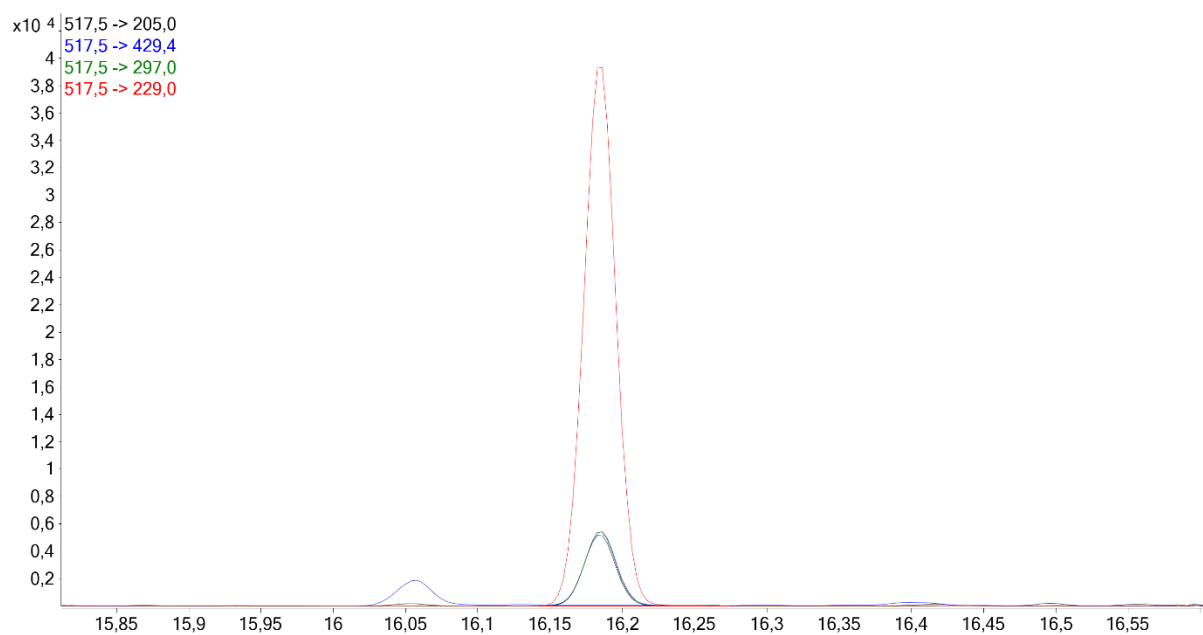

Figure S3-3: GC-MS chromatogram of 6-OH-metandienone (M2, 13)

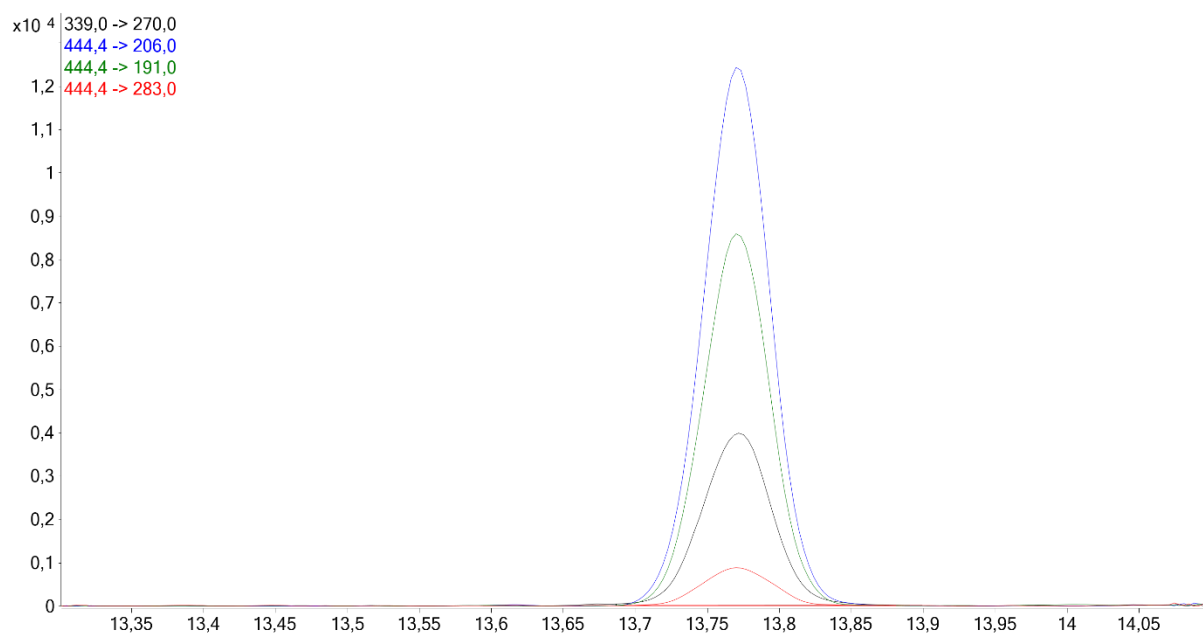

Figure S3-4: GC-MS chromatogram of epimetandienone (M3, 14)

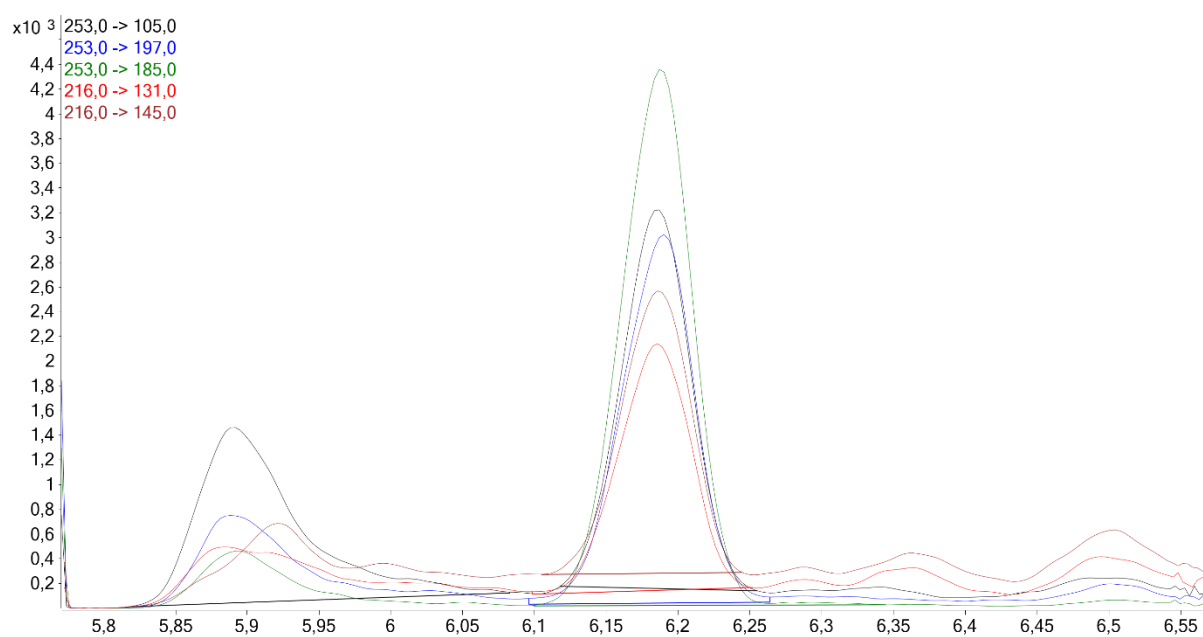

Figure S3-5: GC-QQQ-MS chromatogram of normetendiol (M4, 16)

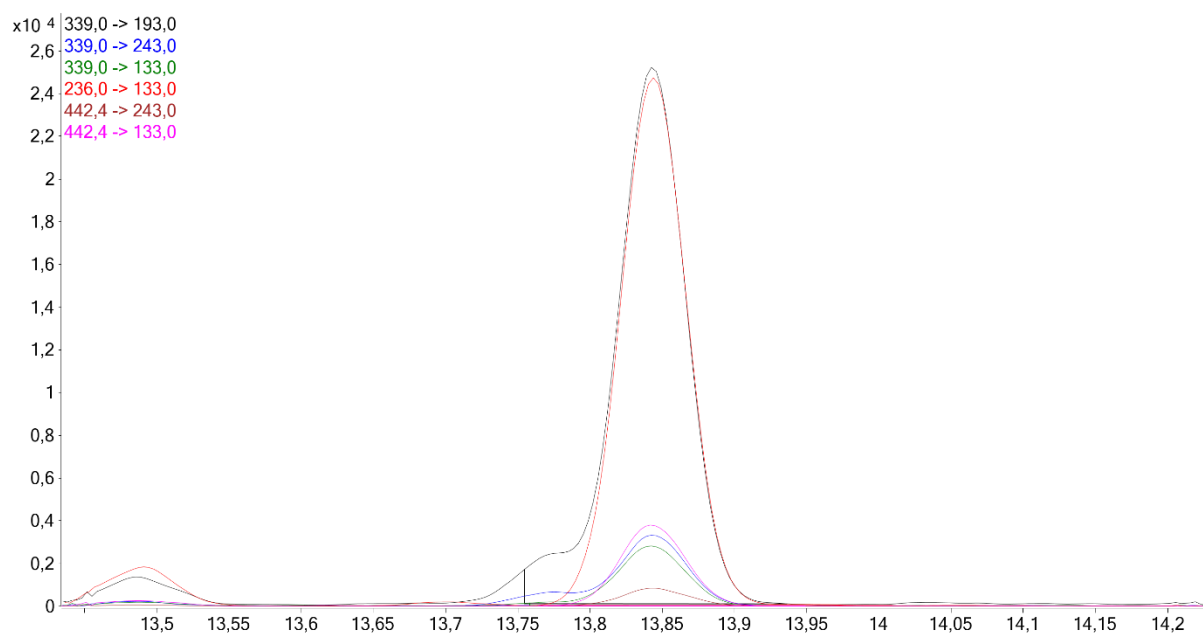Figure S3-6: GC-QQQ-MS chromatogram of 17 $\beta$ -hydroxymethyl-17 $\alpha$ -methyl-18-nor-androst-1,4,13-trien-3-one (M6, 17)

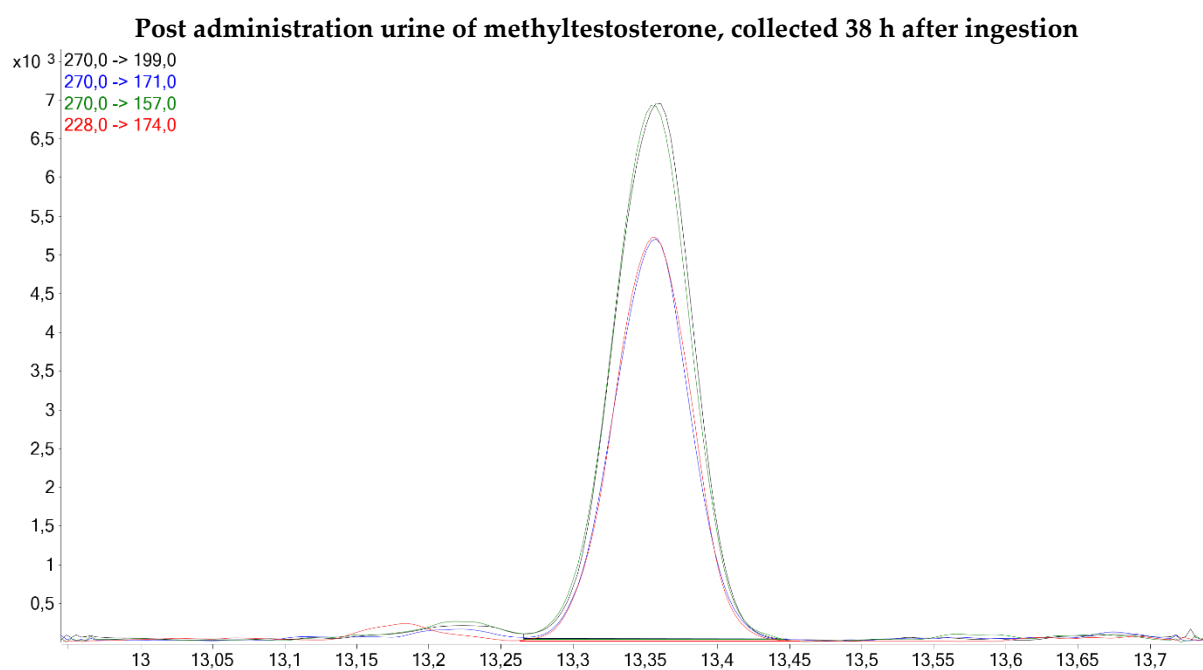Figure S3-7: GC-MS chromatogram of 3 $\alpha$ 5 $\beta$ -tetrahydromethyltestosterone (M1, 20)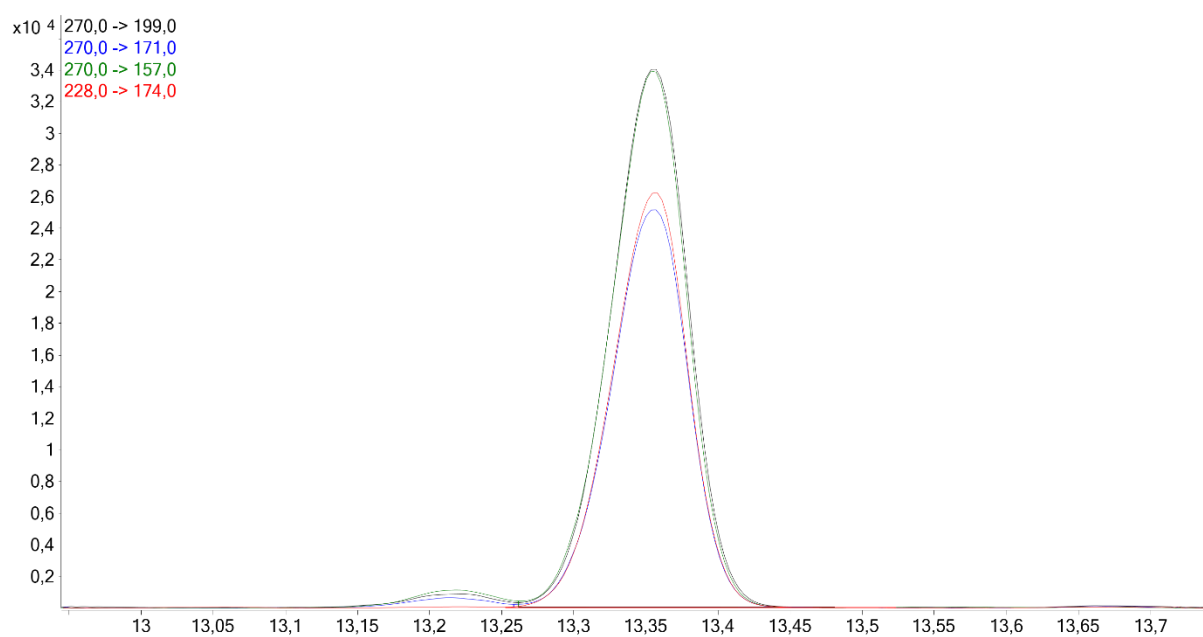Figure S3-8: GC-MS chromatogram of 3 $\alpha$ 5 $\alpha$ -tetrahydromethyltestosterone (M2, 19)
