# Supplementary material for: New Insights into the Metabolism of Methyltestosterone and Metandienone: Detection of Novel A-Ring Reduced Metabolites
Source: MDPI journal article supplement (doi:10.3390/molecules26051354), 2021-03-03
Supplement: s1 [file s1]

Supplement S4: Detailed amounts of reactants and solvents in the synthesis of 17-hydroxymethyl-17-methyl-18-nor-5-androst-13-en-3-ols

Table S4-1: Reactants and solvents used in the methenylation of Etiocholanolone (**5**) or androsterone (**5a**)

|                   | <b>6</b> | <b>6a</b> |
|-------------------|----------|-----------|
| Reagent           |          |           |
| Nysted (20 %)     | 14.2 mL  | 13.4 mL   |
| THF               | 7.0 mL   | 7.0 mL    |
| TiCl <sub>4</sub> | 360 µL   | 330 µL    |
| Precursor Steroid | <b>5</b> | <b>5a</b> |
| Amount of Steroid | 43.0 mg  | 394 mg    |
| HCl (2 M)         | 15 mL    | 25 mL     |
| Ice-cold water    | 15 mL    | 25 mL     |
| Diethyl ether     | 60 mL    | 100 mL    |

Table S4-2: Reactants and solvents used for epoxidation

|                   | <b>7</b> | <b>7a</b> |
|-------------------|----------|-----------|
| Reagent           |          |           |
| Precursor Steroid | <b>6</b> | <b>6a</b> |
| DCM               | 5 mL     | 20 mL     |
| KHCO <sub>3</sub> | 44.5 mg  | 440 mg    |
| m-CPBA            | 31.0 mg  | 370 mg    |
| H <sub>2</sub> O  | 10 mL    | 20 mL     |
| DCM               | 20 mL    | 50 mL     |
