# Supplementary material for: New Insights into the Metabolism of Methyltestosterone and Metandienone: Detection of Novel A-Ring Reduced Metabolites
Source: MDPI journal article supplement (doi:10.3390/molecules26051354), 2021-03-03
Supplement: s1 [file s1]

**Supplement S1.** List of steroids

| No. | Systematic Name                                 | Structure                                                                             |
|-----|-------------------------------------------------|---------------------------------------------------------------------------------------|
| 1   | Androst-4-ene-3,17-dione                        | 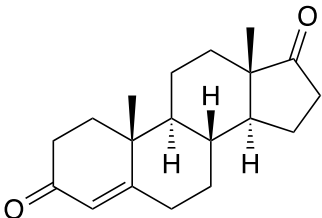   |
| 2   | Spiro[androst-4-ene-17-2'-[1,3]-dioxolan]-3-one |    |
| 3   | Spiro[5β-androstane-17-2'-[1,3]-dioxolan]-3-one |  |
| 4   | Spiro[5β-androstane-17-2'-[1,3]-dioxolan]-3α-ol |  |
| 5   | 3α-Hydroxy-5β-androstan-17-one                  |  |

|    |                                                                                               |  |
|----|-----------------------------------------------------------------------------------------------|--|
| 5a | 3 $\alpha$ -Hydroxy-5 $\alpha$ -androstan-17-one                                              |  |
| 6  | 17-Methylen-5 $\beta$ -androstan-3 $\alpha$ -ol                                               |  |
| 6a | 17-Methylen-5 $\alpha$ -androstan-3 $\alpha$ -ol                                              |  |
| 7  | Spiro[5 $\beta$ -androstan-17,2'-oxiran]-3 $\alpha$ -ol                                       |  |
| 7a | Spiro[5 $\alpha$ -androstan-17,2'-oxiran]-3 $\alpha$ -ol                                      |  |
| 8  | 17 $\alpha$ -Hydroxymethyl-17 $\beta$ -methyl-18-nor-5 $\beta$ -androst-13-en-3 $\alpha$ -ol  |  |
| 8a | 17 $\alpha$ -Hydroxymethyl-17 $\beta$ -methyl-18-nor-5 $\alpha$ -androst-13-en-3 $\alpha$ -ol |  |

|     |                                                                         |                                                                                       |
|-----|-------------------------------------------------------------------------|---------------------------------------------------------------------------------------|
| 9   | 17 $\alpha$ -Hydroxy-17 $\beta$ -methyl-androst-4-en-3-one              | 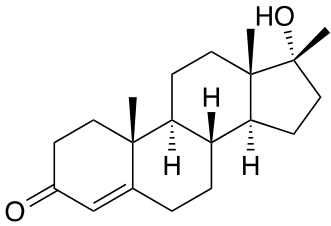   |
| 10  | 17 $\alpha$ -Hydroxy-17 $\beta$ -methyl-5 $\beta$ -androstan-3-one      |    |
| 10a | 17 $\alpha$ -Hydroxy-17 $\beta$ -methyl-5 $\alpha$ -androstan-3-one     |    |
| 11  | 17 $\beta$ -Methyl-5 $\beta$ -androstane-3 $\alpha$ ,17 $\alpha$ -diol  |   |
| 11a | 17 $\beta$ -Methyl-5 $\alpha$ -androstane-3 $\alpha$ ,17 $\alpha$ -diol |  |
| 11b | 17 $\beta$ -Methyl-5 $\beta$ -androstane-3 $\beta$ ,17 $\alpha$ -diol   |  |
| 11c | 17 $\beta$ -Methyl-5 $\alpha$ -androstane-3 $\beta$ ,17 $\alpha$ -diol  |  |

|    |                                                                                  |  |
|----|----------------------------------------------------------------------------------|--|
| 12 | 17 $\beta$ -Hydroxy-17 $\alpha$ -methyl-androsta-1,4-dien-3-one                  |  |
| 13 | 6 $\beta$ ,17 $\beta$ -Dihydroxy-17 $\alpha$ -methyl-androsta-1,4-dien-3-one     |  |
| 14 | 17 $\alpha$ -Hydroxy-17 $\beta$ -methyl-androsta-1,4-dien-3-one                  |  |
| 15 | 17 $\beta$ -Methyl-5 $\beta$ -androst-1-en-3 $\alpha$ ,17 $\alpha$ -diol         |  |
| 16 | 17,17-Dimethyl-18-nor-5 $\beta$ -androsta-1,13-dien-3 $\alpha$ -ol               |  |
| 17 | 17 $\beta$ -Hydroxymethyl-17 $\alpha$ -methyl-18-nor-androsta-1,4,13-trien-3-one |  |
| 18 | 17 $\beta$ -Hydroxy-17 $\alpha$ -methyl-androst-4-en-3-one                       |  |

|    |                                                                         |                                                                                     |
|----|-------------------------------------------------------------------------|-------------------------------------------------------------------------------------|
| 19 | 17 $\alpha$ -Methyl-5 $\alpha$ -androstane-3 $\alpha$ ,17 $\beta$ -diol | 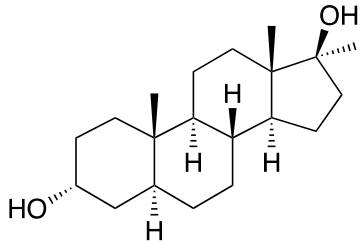 |
| 20 | 17 $\alpha$ -Methyl-5 $\beta$ -androstane-3 $\alpha$ ,17 $\beta$ -diol  |  |
